# Supplementary material
Source: Springer Nature journal article supplement (https://www.springermedizin.de/resource/supplementary/12961_2010_142_MOESM4_ESM.pdf/9571528)
Supplement: MOESM4 [file 9571528]

**Figure 4 - Linkages and strength of relationships between epistemic community members and other policy actors.**

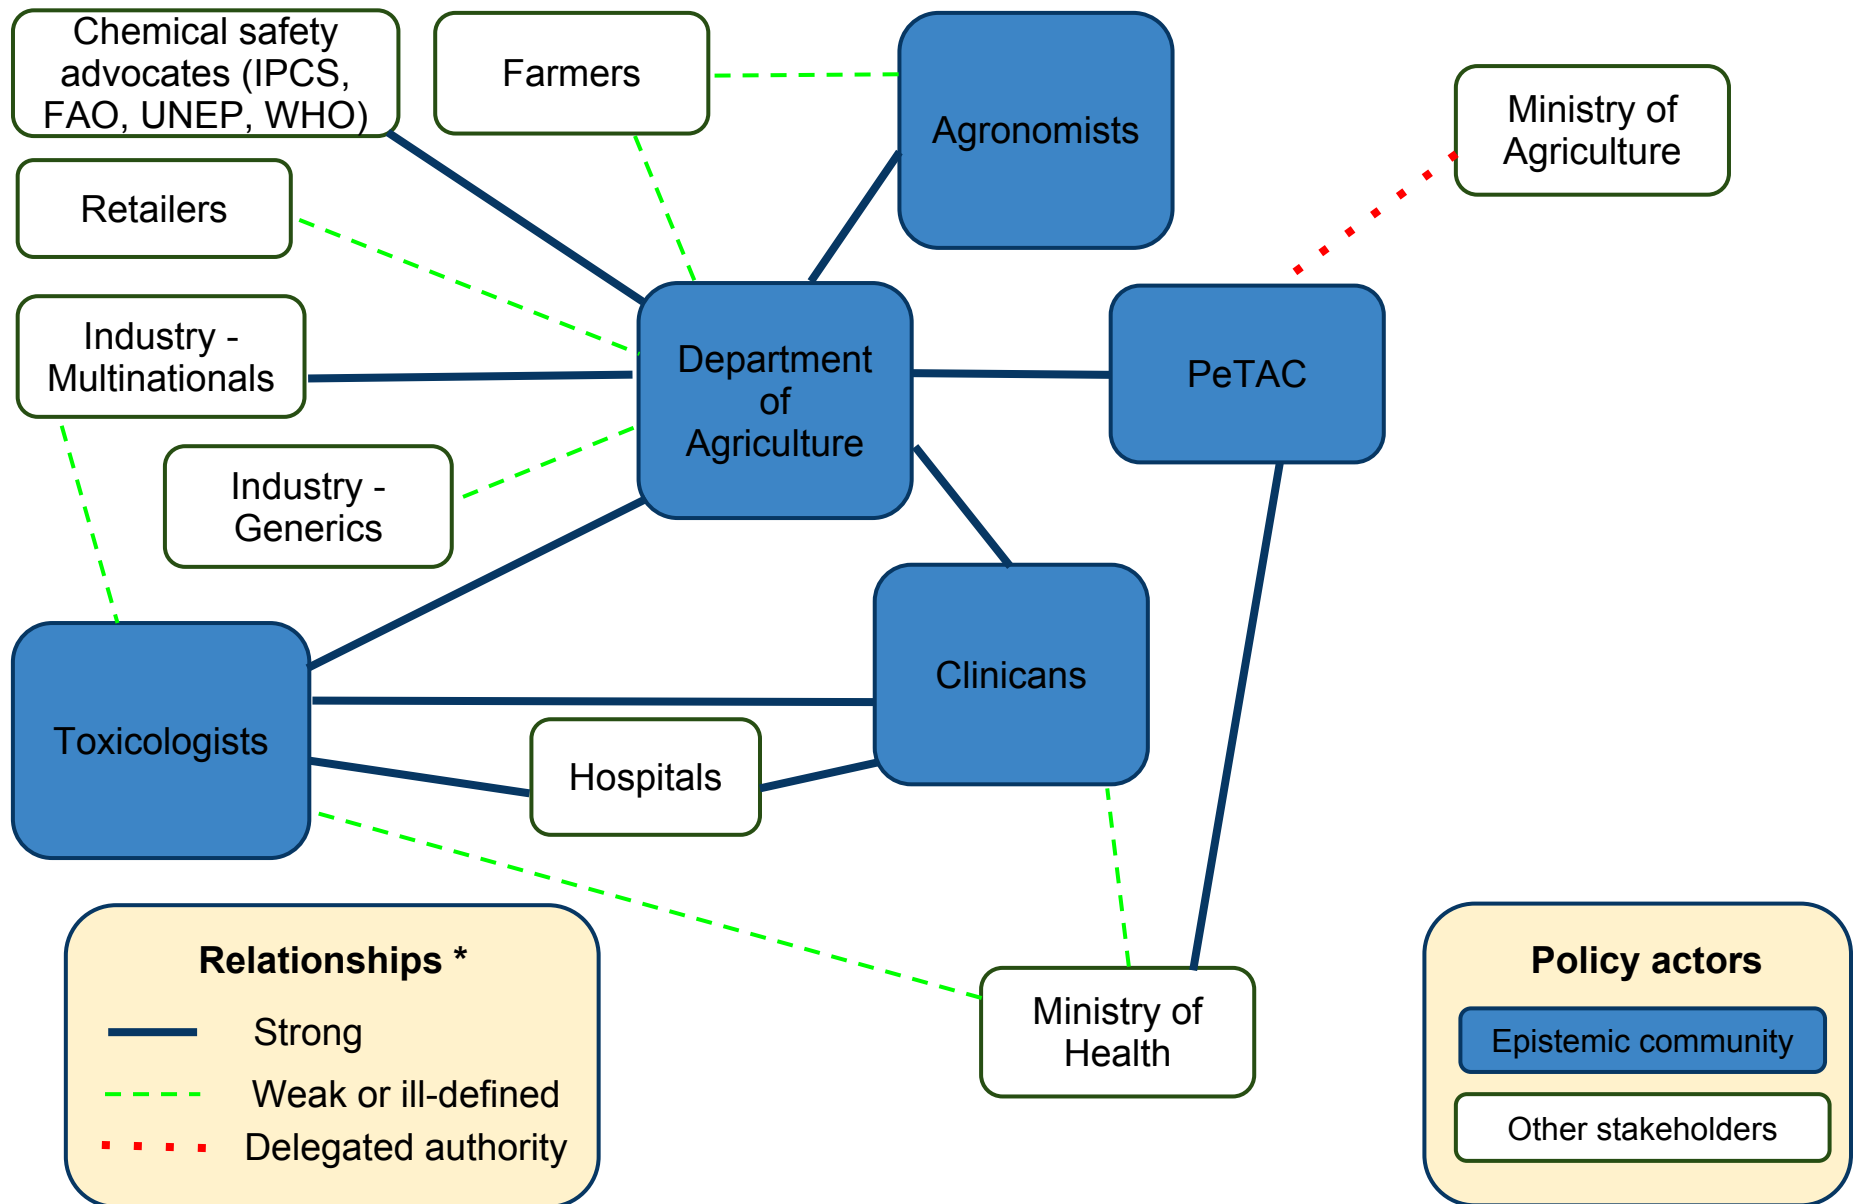

\* These relationships and links are derived from the perspective of the epistemic community actors that includes Agronomists, Department of Agriculture officials, some members of the Pesticide Technical Advisory Committee (PeTAC), Clinicians and Toxicologists. The links outside the epistemic community need further analysis to establish their connections.
